1 **Genomic Selection for End-Use Quality and Processing Traits in Soft White Winter Wheat**  
2 **Breeding Program with Machine and Deep Learning Models**

3

4 Karansher S. Sandhu <sup>1</sup>, Meriem Aoun <sup>1</sup>, Craig Morris <sup>2</sup>, Arron H. Carter <sup>1\*</sup>

5

6 <sup>1</sup>Department of Crop and Soil Sciences, Washington State University, Pullman, WA, USA,  
7 99164

8 <sup>2</sup>USDA-ARS Western Wheat Quality Laboratory, E-202 Food Quality Building, Washington  
9 State University, Pullman, WA, USA, 99164

10

11 Corresponding author: Arron H. Carter

12 Email: [ahcarter@wsu.edu](mailto:ahcarter@wsu.edu)

13

14 **Keywords: Deep learning; end-use quality; genomic selection; grain protein content;**  
15 **machine learning; wheat breeding**

16

17 **Abstract:**

18 Breeding for grain yield, biotic and abiotic stress resistance, and end-use quality are important  
19 goals of wheat breeding programs. Screening for end-use quality traits is usually secondary to  
20 grain yield due to high labor needs, cost of testing, and large seed requirements for phenotyping.  
21 Hence, testing is delayed until later stages in the breeding program. Delayed phenotyping results  
22 in advancement of inferior end-use quality lines into the program. Genomic selection provides an  
23 alternative to predict performance using genome-wide markers. Due to large datasets in breeding  
24 programs, we explored the potential of the machine and deep learning models to predict fourteen  
25 end-use quality traits in a winter wheat breeding program. The population used consisted of 666  
26 wheat genotypes screened for five years (2015-19) at two locations (Pullman and Lind, WA,  
27 USA). Nine different models, including two machine learning (random forest and support vector  
28 machine) and two deep learning models (convolutional neural network and multilayer  
29 perceptron), were explored for cross-validation, forward, and across locations predictions. The  
30 prediction accuracies for different traits varied from 0.45-0.81, 0.29-0.55, and 0.27-0.50 under  
31 cross-validation, forward, and across location predictions. In general, forward prediction  
32 accuracies kept increasing over time due to increments in training data size and was more  
33 evident for machine and deep learning models. Deep learning models performed superior over  
34 the traditional ridge regression best linear unbiased prediction (RRBLUP) and Bayesian models  
35 under all prediction scenarios. The high accuracy observed for end-use quality traits in this study  
36 support predicting them in early generations, leading to the advancement of superior genotypes

37 to more extensive grain yield trailing. Furthermore, the superior performance of machine and  
38 deep learning models strengthen the idea to include them in large scale breeding programs for  
39 predicting complex traits.

40

## 41 **Introduction**

42 Wheat (*Triticum aestivum* L.) breeding programs mainly focus on improving grain yield, biotic  
43 and abiotic stress tolerance, and end-use quality traits. Hexaploid wheat is classified into hard  
44 and soft wheat classes based on kernel texture, milling quality, protein strength, and water  
45 absorption (Souza et al. 2002). Soft wheat flour has lower damaged starch, gluten strengthen, and  
46 non-starch polysaccharides leading to less water absorption. In contrast, hard wheat has higher  
47 damaged starch, gluten strengthen, and non-starch polysaccharides causing higher water  
48 absorption (Kiszonas et al. 2013). Hard wheat dough is mainly used for pan type, leavened  
49 bread, flatbread, and noodles, whereas soft wheat dough is primarily used for cookies, cakes, and  
50 confectionery products (Bhave and Morris 2008; Kiszonas et al. 2013). Washington state was  
51 ranked fourth in the nation's wheat production in 2020. About 80% of wheat grown in eastern  
52 Washington is soft white wheat (SWW), one of the six class grown in the USA. SWW is the  
53 smallest wheat class and is consistently in demand from overseas markets owing to its end-use  
54 quality attributes. More than 85% of the SWW produced in the Pacific Northwest (PNW) region  
55 is exported to markets in countries like Japan, Korea, the Philippines, and Indonesia.

56 End-use quality and processing traits are the combinations of various predefined  
57 parameters. Multiple attributes are measured from milling traits, baking parameters, grain  
58 characteristics, and flour parameters to assess product quality (Guzman et al. 2016). Milling  
59 traits are measured to extract flour and break flour percentage as flour yield and break flour yield  
60 (Morris et al. 2009). In general, soft wheat has a higher break flour yield than hard wheat.  
61 Thermogravimetric ovens are used for calculating the flour ash. Lower flour ash is recommended  
62 as higher amounts of minerals in ash reduces the functionality of most dough and batters (Morris  
63 et al. 2009). The milling score is estimated using flour yield, break flour yield, and flour ash  
64 content and is described in the Material and Methods section. The sugar snap cookie test is a  
65 must for SWW testing to meet expectations of product performance from overseas markets.  
66 Baking of cooking is performed for lines within the breeding program, and SWW lines having  
67 cookie diameter above 9.3 cm is preferred (Kiszonas et al. 2015).

68 Grain characteristics commonly measured in SWW include kernel hardness, kernel size,  
69 kernel weight, test weight, and grain protein content. Kernel weight, kernel size, and kernel  
70 texture (hardness) are measured with a single kernel characterization system (SKCS). Lower  
71 values from the SKCS demonstrate softness; thus, SKCS values are negatively correlated with  
72 break flour yield. However, the two measures of kernel texture are not entirely correlated  
73 because SKCS includes only kernel resistance while break flour yield includes particle size and  
74 grain structure (Campbell et al. 2007). Grain and flour protein content plays a critical role in  
75 confectionery products from SWW. High gluten strength or viscoelastic strength is required for  
76 bread baking, whereas confectionary products require less gluten and water absorption. Gluten

77 strength, and water absorption capacity, is measured using sodium dodecyl sulfate sedimentation  
78 and water solvent retention capacity tests. Lower water absorption in SWW aid in better cookie  
79 spread. Moreover, a flour swelling volume test is conducted to determine the amount of amylose  
80 and amylopectin components in the grain starch. Larger amylopectin content leads to higher  
81 flour swelling volume value, resulting in waxy starches required for certain Asian-style noodles  
82 (Kiszonas et al. 2013; Guzman et al. 2016).

83 Major genes influencing end-use quality traits are typically already fixed in most  
84 breeding programs, especially in different market classes. Until now, marker-assisted selection  
85 has been used for major genes controlling end-use quality, namely, low molecular weight  
86 glutenins, high molecular weight glutenins, granule bound starch synthase 1 (amylose  
87 composition) and puroindolines (kernel hardness) (Gale 2005; Kiszonas et al. 2013). Usage of  
88 these molecular markers only aid in differentiating different wheat classes earlier in the breeding  
89 program; however, they do not provide the complete profile of different end-use quality traits.  
90 Previous linkage mapping and genome-wide association studies in SWW have shown that a large  
91 number of small effect QTLs control most end-use quality traits in addition to the already fixed  
92 genes (Carter et al. 2012; Jernigan et al. 2018). Similarly, 299 small effects QTLs were identified  
93 using multi-locus genome-wide association studies for nine end-use quality traits in hard wheat  
94 (Yang et al. 2020). Kristensen et al. (2018) were unable to identify significant QTLs for Zeleny  
95 sedimentation, grain protein content, test weight, thousand kernel weight, and falling number in  
96 wheat and suggested genomic selection as the best alternative for predicting quantitative traits.

97 Genomic selection (GS) opens up the potential for selecting improved end-use quality  
98 lines due to the small effect of these loci, limited seed availability earlier in the breeding pipeline  
99 for conducting tests, and time constraints in winter wheat for sowing the new cycle (Crossa et al.  
100 2017). GS uses the genotypic and phenotypic data from previous breeding lines or populations to  
101 train predictive statistical models. These trained models are subsequently used to predict the  
102 genomic estimated breeding estimated values (GEBVs) of genotyped lines (Meuwissen et al.  
103 2001). GS has shown the potential to enhance genetic gain by reducing the generation advance  
104 time and improving selection accuracy (Battenfield et al. 2016; Juliana et al. 2019; Sandhu et al.  
105 2021b). This is especially important for winter wheat end-use quality traits, as phenotyping  
106 requires more than three months and data from the quality lab is often not available between  
107 harvest and the time planting occurs. This ultimately results in either the increase of one year in  
108 the breeding cycle or passage of undesirable lines into the next growing season. Furthermore,  
109 phenotyping requires a large amount of seed and is costly, so large-scale testing is often not  
110 conducted until later generations. Currently, the cost of genotyping 10,000 lines with high  
111 density genotyping by sequencing is equivalent to phenotyping 200 lines for end-use quality and  
112 processing traits (Guzman et al. 2016). GS is the best technique for breeding end-use quality  
113 traits after considering time, cost, and seed amount.

114 Genomic selection has been primarily explored in several hard wheat end-use quality trait  
115 studies using the traditional genomic best linear biased prediction (GBLUP), Bayes A, Bayes B,  
116 Bayes C, and Bayes Cpi, showing mixed results, where one model performed best for one trait  
117 and not for another (Heffner et al. 2011a, b). Machine and deep learning models have opened up

118 an entirely new platform for plant breeders and exploring them in the breeding program could  
119 accelerate the pace of genetic gain. Deep learning models have shown higher prediction  
120 accuracies for different complex traits in wheat (Sandhu et al. 2021a), rice (*Oryzae sativa* L.;  
121 Chu and Yu 2020), soybean (*Glycine max* L.; Liu et al. 2019), and maize (*Zea mays* L.; Khaki  
122 and Wang 2019). Sandhu et al. (2021a) have shown that two deep learning models, namely,  
123 convolutional neural network (CNN) and multilayer perceptron (MLP), gave 1-5% higher  
124 prediction accuracy compared to BLUP based models. Ma et al. (2018) and Montesinos-López et  
125 al. (2019) also obtained similar results to predict quantitative traits in wheat and suggested that  
126 deep learning models should be explored due to their better prediction accuracies. To the best of  
127 our literature search, this is the first study exploring the potential of the deep learning models for  
128 predicting the end-use quality traits in wheat.

129 This study explored the potential of GS using multi-environment data from 2015-19 for  
130 end-use quality traits in a soft white winter wheat breeding program. We explored nine different  
131 BLUP based models, Bayesian models, and machine and deep learning models to predict the  
132 fourteen different end-use quality traits. The main objectives of this include, 1) Optimization of  
133 the machine and deep learning models for predicting end-use quality traits, 2) Comparison of  
134 prediction ability of nine different GS models to predict fourteen different end-use quality traits  
135 using cross-validation approaches, and 3) Assess the potential of GS for forward prediction and  
136 across location predictions using previous years training data in the breeding program.

137

## 138 **Materials and Methods**

139 **Germplasm:** A total of 666 soft white winter wheat lines were evaluated for five years at two  
140 locations, namely, Pullman and Lind, WA, USA, from 2015-19. These 666 genotypes consist of  
141 F<sub>4:5</sub> derived lines, double haploid lines, lines in preliminary and advanced yield trials screened as  
142 a part of the Washington State University winter wheat breeding program. F<sub>4:5</sub> derived lines and  
143 double haploid lines were screened for the agronomic and disease resistance traits, and the  
144 superior genotypes were tested for the end-use quality. Lines in preliminary and advanced yield  
145 trials were selected for superior yield, and those lines were later advanced for end-use quality  
146 traits phenotyping. Some genotypes were replicated at a single location per year, whereas others  
147 were un-replicated, creating an unbalanced dataset.

148

149 **Phenotyping:** Fourteen different end-use quality and processing traits were measured, and data  
150 were obtained from the USDA-ARS Western Wheat Quality Laboratory, Pullman, WA. All  
151 these traits were measured following the guidelines of the American Association of Cereal  
152 Chemists International (AACCI 2008). These fourteen traits were divided into four categories:  
153 milling traits, baking parameters, grain characteristics, and flour parameters. The complete  
154 summary of each trait, number of observations, mean, standard error, and heritability is provided  
155 in **Table 1 & Table 2**.

156 Grain characteristics, namely kernel size (KSIZE), kernel weight (KWT), and kernel  
157 hardness (KHRD) were determined using 200 seeds/sample with a SKCS 4100 (Perten  
158 Instruments, Springfield, IL, USA) (AACC Approved Method 55-31.01). Grain protein content  
159 (GPC) was measured using a NIR analyzer (Perten Elmer, Sweden) (AACC Approved Method  
160 39-10.01). Test weight (TWT) was obtained as weight/volume following AACC Approved  
161 Method 55-10.01.

162 Three milling traits, namely flour yield (FYELD), break flour yield (BKYELD), and  
163 milling score (MSCOR) were obtained using a Quadrumat senior experimental mill (Brabender,  
164 South Hackensack, NJ, USA). FYELD was determined as a ratio of total flour weight (mids +  
165 break flour) to the initial sample weight using a single pass through the Quadrumat break roll  
166 unit. BKYELD was estimated as the percent of milled product passing through a 94-mesh\*  
167 screen per unit grain weight. Flour ash (FASH) was obtained using the AACC Approved Method  
168 08-01.01. MSCOR was calculated using the formula:  $MSCOR = (100 - (0.5(16 - 13.0 +$   
169  $(80 - FYELD) + 50(FASH - 0.30))) \times 1.274) - 21.602$ , showing that this trait is a function of  
170 FYELD and FASH content. To evaluate baking parameters, cookie diameter (CODI) was  
171 measured using AACC Approved Method 10-52.02.

172 Four different flour parameters, namely, flour protein (FPROT), water solvent retention capacity  
173 in water (FSRW), flour swelling volume (FSV) and flour sodium dodecyl sulfate sedimentation  
174 (FSDS) were measured from the extracted flour. FPROT was measured following the AACC  
175 Approved Method 39-11.01. FSRW measures the water retention capacity of gluten, gliadins,  
176 starch, and arabinoxylans using the AACC Approved Method 56-11.02. The FSDS test was used  
177 to measure strength of gluten by following the AACC Approved Method 56-60.01. The FSV test  
178 assesses starch composition following the AACC Approved Method 56-21.01.

179

180 **Statistical analysis:** Due to the unbalanced nature of the dataset, adjusted means were calculated  
181 using residuals obtained using the lme4 R package for within environment analysis. The model  
182 equation is represented as

$$183 Y_{ij} = \text{Block}_i + \text{Check}_j + e_{ij}$$

184 Where  $Y_{ij}$  is the raw phenotype;  $\text{Check}_j$  is the effect of replicated check cultivar;  $\text{Block}_i$   
185 corresponds to the fixed block effect; and  $e_{ij}$  is the residuals (Bates et al. 2015).

186 Adjusted means across the environments were calculated following the method implemented in  
187 Sandhu et al. (2021c) and is as follows

$$188 Y_{ijk} = \mu + \text{Block}_i + \text{Check}_j + \text{Env}_k + \text{Block}_i \times \text{Env}_k + \text{Check}_j \times \text{Env}_k + e_{ijk}$$

189 Where  $Y_{ijk}$  is the raw phenotype value;  $\text{Block}_i$ ,  $\text{Check}_j$ , and  $\text{Env}_k$  are the fixed effect of  $i$ th block,  
190  $j$ th check, and  $k$ th environment; and  $e_{ijk}$  is the residuals.

191 Best linear unbiased predictors (BLUPs) for individuals and across environments were used to  
192 obtain the variance components for estimating broad sense heritability. The equation for  
193 heritability used was

$$H_C^2 = 1 - \frac{\bar{v}_{\Delta..}^{\text{BLUP}}}{2\sigma_g^2}$$

194 Where  $H_C^2$  is the Cullis heritability;  $\sigma_g^2$  is genotypic variance; and  $\bar{v}_{\Delta..}^{\text{BLUP}}$  is the mean-variance of  
195 BLUPs (Cullis et al. 2006).

196

197 **Genotyping:** The whole population was genotyped using GBS through the North Carolina State  
198 University (NCSSU) Genomics Sciences Laboratory, Raleigh, NC, using the restriction enzymes  
199 *PstI* and *MspI* (Poland et al. 2012). LGC Biosearch Technologies Oktopure™ robotic platform  
200 with sbeadex™ magnetic microparticle reagent kits were used to extract the DNA from the  
201 leaves of ten-day-old seedlings. Thermo Fisher (Waltham, MA) Quant-It™ PicoGreen™ assays  
202 were used to quantify the DNA, and the samples were normalized to 20 ng/μL. Restriction  
203 enzymes *PstI* and *MspI* were used for sample fragmentation, and the digested samples were  
204 ligated with barcode adapters using T4 ligase. The pooled samples were amplified using PCR,  
205 following Poland et al. (2012), and sequencing was performed at NCSU Genomics Sciences  
206 Laboratory. Burrows-Wheeler Aligner (BWA) 0.7.17 was used to align the sequences to the  
207 Chinese Spring (IWGSC) RefSeq v1.0 reference genome (Appels et al. 2018). Tassel v5 and  
208 Beagle were used for SNP discovery, calling, and imputation (Bradbury et al. 2007). Quality  
209 filtering pipeline was implemented in R software to remove markers with minor allele frequency  
210 less than 5%, markers missing more than 20% data, and heterozygosity more than 15%. After the  
211 complete filtering pipeline, 40,518 SNPs remained and used for population structure and  
212 genomic prediction.

213

214 **Genomic selection models:** We explored the performance of five parametric and four non-  
215 parametric models for all fourteen traits evaluated in this study. Parametric models used were  
216 RRBLUP, Bayes B, Bayes A, Bayes Lasso, and Bayes C. Non-parametric models included two  
217 machine and two deep learning models. The complete information for all those models and  
218 optimization process is provided as follows:

219 **Ridge regression best linear unbiased prediction (RRBLUP):** RRBLUP was included here as  
220 the benchmark for comparing its performance with other models due to frequent use in wheat  
221 breeding and ease of implementation. The model assumes that all markers contribute to the trait  
222 and has a constant effect variance. Marker effects and variance patterns are estimated using the  
223 restricted estimated maximum likelihood (REML) function based on phenotypic and marker data  
224 (Endelman 2011). The RRBLUP model was implemented with the R package rrBLUP using the  
225 *mixed.solve* function. The model can be represented as

$$y = \mu + Zu + e$$

226 Where  $\mu$  is the overall mean;  $y$  is the vector of adjusted means;  $u$  is a vector with normally  
227 distributed random marker effects with constant variance as  $u \sim N(0, I\sigma_u^2)$ ;  $Z$  is an  $N \times M$  matrix  
228 of markers; and  $e$  is the residual error distributed as  $e \sim N(0, I\sigma_e^2)$ . The solution for mixed  
229 equation can be written as

$$230 u = Z^T (ZZ^T + \lambda I)^{-1} y$$

231 Where  $u$ ,  $Z$  and  $y$  are explained above;  $I$  is an identity matrix and  $\lambda$  is represented as  $\lambda = \sigma_e^2 / \sigma_u^2$   
232 and is the ridge regression parameter (Endelman 2011).

233 **Bayesian models:** We implemented four different Bayesian models, namely, Bayes Lasso,  
234 Bayes A, Bayes B, and Bayes C. All these models assume different prior distributions for  
235 estimating marker effects and variances. Bayes A applies the inverted chi-squared probability  
236 distribution for estimating marker variances. Bayes B provides a more realistic scenario for  
237 breeding, assuming that all markers do not contribute to total genetic variation. It applies a  
238 mixture of prior distribution with a high probability mass at zero, and others follow the Gaussian  
239 distribution. Bayes C and Bayes Lasso follow the mixture of the prior distribution (point mass at  
240 zero with scaled-t distribution) and long-tail student t distribution (Pérez and Campos 2014). All  
241 the Bayesian models were implemented using the BGLR R package using the model equation

$$y_i = \mu + \sum_{j=1}^{j=p} x_{ij}\beta_j + \epsilon_i$$

242 Where  $\mu$ ,  $y_i$ ,  $x_{ij}$ , and  $\epsilon_i$  are defined above; and  $\beta_j$  is the  $j$ th marker effect. Each Bayesian model  
243 used in this study has separate conditional prior distribution. Analysis was performed with  
244 30,000 Monte Carlo Markov chain iterations with 10,000 burn-in iterations (Pérez and Campos  
245 2014).

246 **Random forests (RF):** RF involves building a large collection of identical distributed trees and  
247 averages from the trees for final prediction. Different bootstrap samples are performed over the  
248 training set to identify the best feature subsets for splitting the tree nodes. The main criteria for  
249 splitting at the node include lowering the loss function during each bootstrapped sample (Shah et  
250 al. 2019). Model equation is represented as

$$\hat{y}_i = \frac{1}{B} \sum_{b=1}^B T_b(x_i)$$

251 Where  $\hat{y}_i$  is the predicted value of the individual with genotype  $x_i$ ;  $T$  is the total number of trees;  
252 and  $B$  is the number of bootstrap samples. The main steps involved in model functioning  
253 includes

- 254 1. Bootstrap sampling ( $b = (1, \dots, B)$ ) to select plants with replacement from the training  
255 set, and an individual plant can appear once or several time during the sampling
- 256 2. Best set of features ( $\text{SNP}_j$ ,  $j = (1, \dots, J)$ ) were selected to minimize the mean square error  
257 (MSE) using the max feature function in the random forest regression library.
- 258 3. Splitting is performed at each node of the tree using the  $\text{SNP}_j$  genotype to lower the MSE.
- 259 4. The above steps are repeated until a maximum depth is reached or a minimum node. The  
260 final predicted value of an individual of genotype  $x_i$  is the average of the values from the  
261 set of trees in the forest.

262 The important hyperparameter model training include the depth of the trees, the importance of  
263 each feature, the number of features sampled for each iteration, and the number of trees.  
264 Randomized grid search cross-validation was used for hyperparameter optimization. The  
265 combination of hyperparameters that were tried included max depth (40, 60, 80, 100), max  
266 features (auto, sqrt), and number of trees (200, 300, 500, 1000) (Hastie et al. 2009). The Scikit  
267 learn, and random forest regression libraries in Python 3.7 were used for analysis (Gulli and Pal  
268 2017).

269 **Support vector machine (SVM):** SVM uses the non-linear kernel for mapping the predictor  
270 space to high dimensional feature space for studying the relationship between marker genotype  
271 and phenotypes. The model equation is represented as

$$f(x) = wx + b$$

272 Where  $f(x)$  is learning function;  $b$  is the constant, reflecting the maximum allowed bias;  $w$  is the  
273 unknown weight; and  $x$  is the marker set. The learning function is mapped by minimizing the  
274 loss function as

$$C \sum_{i=1}^n L(e_i) + \frac{1}{2} \|w\|^2$$

275 Where  $C$  is a positive regularization parameter;  $\|w\|^2$  represents model complexity,  $e_i = y - f(x)$   
276 is the associated error with the  $i^{\text{th}}$  training data point, and  $L$  is the loss function (Smola and  
277 Scholkopf 2004).

278 **Multilayer perceptron (MLP):** MLP is the feed-forward deep learning model that uses three  
279 layers, namely, input, hidden, and output, for mapping the relationship. These layers are  
280 connected by a dense network of neurons, where each neuron has its characteristic weight. MLP  
281 uses the combination of neurons, activation function, learning rate, hidden layers, and  
282 regularization for predicting the phenotypes. Input layer corresponds to SNP genotypes while  
283 neurons connect multiple hidden layer with associated strength (weight). The output of the  $i^{\text{th}}$   
284 hidden layer is represented as

$$Z_i = b_{(i-1)} + W_i f_{(i-1)}(x)$$

285 Where  $Z_i$  is the output from the  $i^{\text{th}}$  hidden layer;  $b_0$  is the bias for estimating neurons weight;  $f_{(i-1)}$   
286 represents the activation function; and  $W_i$  is the weight associated with the neurons, and this  
287 process is repeated until the output layer.  
288

289 Keras function's grid search cross-validation and internal capabilities were used for optimizing  
290 the hyperparameters. Hyperparameters giving the lowest MSE were identified and used for  
291 output prediction (Cho and Hegde 2019). Regularization, dropout, and early stopping were  
292 applied to control overfitting. Furthermore, information about hyperparameter optimization and  
293 deep learning models is referred to in Sandhu et al. (2021a, c).

294 **Convolutional neural network (CNN):** CNN is a special case of deep learning model that  
295 accounts for the specific pattern present between the input features. Information about the CNN  
296 model, its implementation, and hyperparameter optimization are referred to in previous  
297 publications (Sandhu et al. 2021a, d). A combination of input, convolutional, pooling, dense,  
298 flatten, dropout, and output layers were applied for the prediction. Like MLP, hyperparameter  
299 was optimized using grid search cross-validation to select filters, activation function, solver,  
300 batch size, and learning rate. Regularization, dropout, and early stopping were applied to control  
301 overfitting. All the deep learning algorithms were implemented using Scikit learn and Keras  
302 libraries (Pedregosa et al. 2011; Srivastava et al. 2014).

303

304 **Prediction accuracy and cross-validation scheme:** Prediction accuracy was evaluated using  
305 five-fold cross-validation where 20% of the data was used for testing and the remaining 80% for  
306 training within each environment. One hundred replications were performed for assessing each



307 model's performance. One replicate consisted of five iterations where data is split into five  
308 different groups. Prediction accuracy was reported as the Pearson correlation coefficient between  
309 the true (observed phenotype) and GEBVs. Separate analysis was performed for both locations  
310 using a cross-validation approach to assess the model's performance.

311 Independent predictions or forward predictions were performed by training the model on  
312 previous year data and predicting future environments (i.e., 2015 data from Lind was used to  
313 predict 2016; 2015 and 2016 data predicts 2017, and so on for both locations). In the end, we  
314 tried to predict the 2019 environment of both locations by using the whole data set from the other  
315 location (i.e., 2015-19 data from Lind was used to predict 2019 in Pullman). Forward prediction  
316 represents real prediction scenarios in breeding programs where previous data are used to predict  
317 future environments. Due to computational burden, all the GS models were analyzed over the  
318 Kamiak high-performance cluster (<https://hpc.wsu.edu/>).

319

## 320 **Results**

321 **Phenotypic data summary:** **Table 1** provides the information about different lines screened for  
322 end-use quality traits across years at two locations. One thousand three hundred thirty-five lines  
323 were phenotypically screened for end-use quality traits across five years (2015-19) at two  
324 locations (**Table 1**). Overall, Pullman had more lines compared to Lind for each year. Summary  
325 statistics, including mean, minimum, maximum, standard error, and heritability are provided for  
326 all the fourteen end-use quality traits (**Table 2**). Broad sense heritability ranged from 0.56 to 0.93  
327 for different traits. All the traits were highly heritable except GPC and FPROT (**Table 2**).

328 Significant positive and negative correlations were observed among different traits (**Figure 1**).  
329 Moderately high positive correlations were observed between FYELD and BKFYELD, KSIZE  
330 and KWT, GPC and FPROT, FSDS and FPROT, GPC and FSDS, and FSRW and KHRD  
331 (**Figure 1**). Similarly, moderately high negative correlations were seen between FASH and  
332 MSCOR, CODI and KHRD, GPC and FSV, FSDS and CODI, and CODI and FSRW (**Figure 1**).  
333 Most of the traits were not strongly correlated with each other, suggesting that a single quality  
334 trait cannot substitute others; hence, measurements from all of them are required for selection  
335 decisions.

336

337 **Cross-validation genomic selection accuracy and model comparison:** Complete datasets  
338 across the years from Pullman and Lind were used to predict the fourteen end-use quality traits  
339 using nine different models (**Table 3, Figure 2**). Five-fold cross-validation was performed to  
340 compare the results from the models at both locations. Prediction accuracy at Pullman varied  
341 from 0.52-0.81 for all traits with nine different GS models. The highest prediction accuracy was  
342 0.81 for KWT and KSIZE with the RF and MLP model at Pullman (**Figure 2**). The lowest  
343 prediction accuracies were for GPC, FASH, FPROT, and FSRW at Pullman using different GS  
344 models (**Table 3**). The highest prediction accuracy for each trait is bolded for comparison with  
345 other models (**Table 3**). For the fourteen end-use quality traits evaluated in this study at  
346 Pullman, deep learning models, namely MLP and CNN, performed best for eight of the traits,  
347 demonstrating the potential to incorporate them into breeding programs (**Table 3**) for prediction.

348 RF and SVM performed best for three and four traits out of the fourteen, while RRBLUP  
349 performed superior for only one trait (**Table 3 and Figure 2**).

350 Prediction accuracies (0.454-0.70) within the Lind dataset were lower than Pullman for all traits  
351 (**Table 2**). Similar to Pullman, the highest cross-validation prediction accuracy (i.e. 0.70) was  
352 obtained for KWT at Lind. The lowest prediction accuracies were obtained for GPC, FPROT,  
353 and FSRW using the Bayesian models (**Table 3**). Machine and deep learning models performed  
354 superior for twelve out of the fourteen end-use quality traits (**Figure 2**). **Table 3** provides the  
355 average performance for all models, and we observed that machine and deep learning models  
356 performed superior to RRBLUP and all the Bayesian models. On average, machine and deep  
357 learning models performed 10% and 5%, superior to Bayesian and RRBLUP. Due to Bayesian  
358 model's inferior performances and computational burden, they were not included for across  
359 location predictions (**Figure 5**).

360

361 **Forward predictions:** GS model predictions were assessed to reflect the power of training size  
362 to predict the phenotypes in future years. **Figures 3 and 4** show the results for forward  
363 predictions at Pullman and Lind when combined data from the previous years were used to  
364 predict the phenotypes. The X-axis represents the year for which predictions were made while  
365 training the models on all the previous year's phenotypic data (**Figure 3 & 4**). We saw a gradual  
366 increase in prediction accuracy for all the traits as we kept increasing the training data size, and  
367 the same trend was observed for both locations (**Figure 3 & 4**). The highest improvement in  
368 prediction accuracy was observed for GPC, FPROT, FASH, and FSDS, owing to the complex  
369 nature of these traits and demonstrating the importance of training size. Similar to cross-  
370 validation prediction accuracy (**Table 3**), the highest forward prediction accuracy was obtained  
371 with machine and deep learning models, especially when the training data size kept increasing  
372 (**Figure 3 & 4**). Bayesian models performed worst for all of the traits and at both locations, even  
373 when training data size was increased.

374 Forward predictions in 2019 were, on average, 32% and 29% greater than the forward  
375 predictions in 2016 for Pullman and Lind (**Figure 3 & 4**). The highest improvement in forward  
376 predictions from 2016 to 2019 was 0.35 to 0.55 for CODI, while the lowest was 0.26 to 0.29 for  
377 KWT (**Figure 3**). The highest improvement was seen for MLP and CNN, demonstrating as the  
378 size of training data increases, deep learning models result in the highest improvement in  
379 prediction accuracy. Furthermore, cross-validation prediction accuracies were, on average, 34%  
380 and 32% more than forward prediction in 2019 for Pullman and Lind (**Table 3, Figure 3 & 4**),  
381 suggesting that cross-validation scenarios over-inflate prediction accuracies.

382

383 **Across location predictions:** Across location predictions were performed where data from Lind  
384 was used to train the model for predicting performances in Pullman and vice versa. Owing to all  
385 the Bayesian model's worst performance and computational burden in cross-validation and  
386 forward predictions, these models were eliminated for the across location predictions. **Figure 5**  
387 **and Table 4** showed the prediction accuracy for all fourteen end-use quality traits when  
388 predictions were made for 2019\_Pullman by models training on the whole Lind dataset and vice  
389 versa. The across location prediction accuracies were, on average, 16% and 47% less than  
390 forward and cross-validation prediction accuracies, demonstrating the importance of inclusion of

391 genotype by environment interaction components into the GS models for across location and  
392 environment predictions.

393 Deep learning models performed best for across location prediction compared to RRBLUP and  
394 machine learning models (**Table 4 & Figure 5**). The highest prediction accuracy was 0.50 for  
395 FYELD with a MLP model for predicting 2019\_Pullman (**Table 4**). The lowest prediction  
396 accuracies were for MSCOR, GPC, and FSV with the RRBLUP model for predicting  
397 2019\_Pullman (**Table 4**). Out of the four models used, twelve end-use quality traits were best  
398 predicted by deep learning models under the 2019\_Pullman scenario, while RF performed best  
399 for the remaining two traits (**Table 4**). In 2019\_Lind predictions, the highest accuracy again 0.50  
400 for FYELD with the MLP model, and lowest was for GPC and MSCOR with the RRBLUP  
401 model. Similar to 2019\_Pullman, deep learning models performed best for eleven out of the  
402 fourteen traits evaluated in 2019\_Lind.

403

## 404 **Discussion**

405 Selection for end-use quality traits is often more difficult to conduct compared to grain yield,  
406 disease resistance, and agronomic performance, due to the cost, labor, and seed quantity  
407 requirements (Chhabra et al. 2021). Phenotyping for quality traits is usually delayed until later  
408 generations, resulting in creating small population sizes with unbalanced datasets (Battenfield et  
409 al. 2016). This study explored the potential of GS, especially machine and deep learning models,  
410 for predicting fourteen different end-use quality traits using five years (2015-19) of phenotyping  
411 data from a winter wheat breeding program. The prediction accuracy in this study varied from  
412 0.27-0.81, demonstrating the potential of its implementation in the breeding program. We  
413 observed that forward and across location prediction accuracies could be increased using deep  
414 and machine learning models without accounting for genotype by environment interaction,  
415 environment covariates, and kernel matrices in traditional GS models. Furthermore, QTLs or  
416 major genes controlling quality traits are typically already fixed in the particular market class or  
417 breeding programs; hence, GS is the best substitute for marker-assisted selection by exploring  
418 different combinations of QTL to achieve the best variety (Lorenz 2013).

419 The broad-sense heritability of end-use quality traits evaluated varied from 0.56 to 0.93,  
420 with the majority of them having a value above 0.80. Similar heritability values were obtained by  
421 Michel et al. (2018), Jernigan et al. (2017), and Kristensen et al. (2019) for different baking and  
422 flour yield parameters of winter wheat. These intermediate to high heritability estimates  
423 suggested that most of the variation in these traits is genetic and less affected by environment  
424 and genotype by environment interactions (Tsai et al. 2020). Therefore, GS is the best option for  
425 predicting these traits due to capturing most of the additive genetic variation by the models, as  
426 observed in this study, due to intermediate to high prediction accuracy for different quality traits.  
427 We observed that only a few grain and flour assessments traits were correlated. These low  
428 correlations among most end-use quality traits strengthen the fact that no single quality  
429 parameter can assist in final variety selection, but that many are needed (Souza et al. 2002). Only  
430 three end-use quality traits, namely, GPC, FPROT and FSV, had intermediate heritability values,  
431 which were also reported in previous studies due to their complex and polygenic inheritance

432 nature (Hayes et al. 2017; Sandhu et al. 2021c). Similarly, comparatively low prediction  
433 accuracies obtained from these traits validated the fact for inclusion of genotype by environment  
434 interaction or environmental covariates for their prediction (Monteverde et al. 2019).

435 Cross-validation prediction accuracies were, on average, 34% and 32% higher than  
436 forward prediction in 2019 for Pullman and Lind. The higher cross-validation prediction  
437 accuracies compared to forward and across location prediction suggests the importance of  
438 including bigger training sets, genotype by environment interactions, and environment covariates  
439 for exploiting the maximum variation to make predictions (Gouy et al. 2013). Higher accuracies  
440 obtained in cross-validation showed that most of those values are over-inflated, and attention is  
441 required before making any final decision about those large values to adopt GS in the breeding  
442 program (Cossa et al. 2014). Cross-validation approaches included training and testing sets from  
443 the same environment, thus accounting for environmental variation in prediction. Moreover,  
444 most of the lines evaluated in breeding programs are usually closely related or full sibs and  
445 confound cross-validation approaches, where full sibs might be in the same training or testing  
446 group, causing inflation in prediction accuracies (Rutkoski et al. 2015). The relationship  
447 between individuals in the training and testing set profoundly affects model performance, with a  
448 closer relationship resulting in higher accuracy. Forward and across location prediction are the  
449 best method for studying the importance of GS implementation in the breeding program (Habier  
450 et al. 2013; Fiedler et al. 2017).

451 Continuous increments in forward prediction accuracy with all nine models demonstrated  
452 the importance of a large training population and more environments for training the GS model  
453 (Yao et al. 2018). He et al. (2016) and Battenfield et al. (2016) observed an increase in forward  
454 prediction in spring wheat end-use quality traits. Similarly, Meuwissen et al. (2016) suggested  
455 updating the GS model with a large training population every cycle to increase prediction  
456 accuracy. They observed a rise in genetic gain for fertility, longevity, milk production, and other  
457 traits in cows by following this. Deep learning models saw the greatest improvement in forward  
458 prediction accuracy by including more training data and new environments, supporting the  
459 importance of big data for their best performance (Cuevas et al. 2019). Furthermore, across  
460 location predictions were superior by using deep learning models. This could be attributed to  
461 capturing genetic, environmental, and genotype by environment interaction components by these  
462 models without explicit programming (Montesinos-López et al. 2019c). Across location  
463 prediction can be further improved by including genotype by environment interactions or  
464 environment covariates like weather or soil parameters into the GS models to make across  
465 location and environment selections (Jarquín et al. 2014; Monteverde et al. 2019).

466 We observed differences in model prediction accuracies under all scenarios evaluated in  
467 this study, where machine and deep learning models performed superior to Bayesian and  
468 RRBLUP models. This difference in model performance is attributed to the different genetic  
469 architecture of each trait, dependent upon the heritability and number of QTLs controlling that  
470 trait (Plavšín et al. 2021). Similar results were obtained by various other studies showing the  
471 superiority of machine learning models over conventional Bayesian models in wheat (Gianola et  
472 al. 2006; Montesinos-López et al. 2019a; Merrick and Carter 2021). Hu et al. (2019) showed that

473 random forest performed superior to the Bayesian and RRBLUP for predicting thousand kernel  
474 weight, grain protein content, and sedimentation volume in wheat under forward prediction  
475 scenario, further strengthening our findings that machine and deep learning models should be  
476 explored for such conditions. Furthermore, we observed that highly heritable traits in this study  
477 have higher prediction accuracy than moderately heritable traits, suggesting that in addition to  
478 genetic architecture, the heritability of a trait also plays an important role in final prediction  
479 accuracy (Huang et al. 2016; Hayes et al. 2017).

480 Machine and deep learning models performed better than all Bayesian and RRBLUP  
481 models under cross-validation, forward, and across location predictions. The higher prediction  
482 accuracy observed due to deep and machine learning models is attributed to their flexibility in  
483 deciphering complex interactions between responses and predictors to capture different trends  
484 present in the datasets compared to only additive variation in conventional GS models  
485 (Montesinos-López et al. 2021). Deep and machine learning models explore the whole feature  
486 space during model training using different sets of neurons, activation function, and various  
487 other hyperparameters to identify the best pattern for giving the best prediction scenario  
488 compared to Bayesian models that include a pre-selected prior distribution for final predictions.  
489 Furthermore, most of the traits were predicted best by different deep and machine learning due to  
490 their respective genetic architecture of each trait. Some studies in wheat reported that all models  
491 give the same prediction accuracy irrespective of the model used while others strengthen the  
492 superiority of different models for different traits (Heslot et al. 2015; Schmidt et al. 2016). Ma et  
493 al. (2018) and Montesinos-López et al. (2019) also obtained similar results to predict quantitative  
494 traits in wheat and suggested that deep learning models should be explored due to their better  
495 prediction accuracies.

496 It is believed that machine and deep learning models should be used on very large  
497 training datasets, which is often not possible for end-use quality traits which are evaluated at  
498 later stages of the breeding process. However, this and other studies have shown that even small  
499 dataset can give equivalent or superior performance to the traditional parametric GS models (Ma  
500 et al. 2018; Pook et al. 2020; Sandhu et al. 2021a). Moreover, Bellot et al. (2018) have used a  
501 training set of 100k individuals and showed no advantage of deep learning models over the  
502 conventional GS models. Pérez-Rodríguez et al. (2020) and Liu et al. (2019) showed the  
503 superiority of different deep learning algorithms over conventional GS models using population  
504 sizes of 268 wheat and 4294 soybean lines. These results provide evidence that training datasets  
505 play a minor role in prediction compared to the genetic architecture of the trait, but the  
506 importance of large population sizes in GS models still can't be undermined. The main issue  
507 with using a small dataset for deep learning models is overfitting, resulting in the model's failure  
508 to learn the exact pattern from the dataset (Montesinos-López et al. 2021). Herein, we used  
509 regularization and dropout functions to remove a certain number of neurons during model  
510 training to avoid the overfitting problem (Srivastava et al. 2014; Lecun et al. 2015).

511  
512 **Conclusion:** We assessed the potential of machine and deep learning genomic selection models  
513 for predicting fourteen different end-use quality traits at two locations in a soft white winter

514 wheat breeding program. Different cross-validation, forward, and across location prediction  
515 scenarios were tried for comparing different models and utilization of this approach in the  
516 breeding program. Owing to limited seed availability, time constraint, and associated cost,  
517 phenotyping for quality traits is delayed to later generations. However, the higher accuracy of  
518 prediction models observed in this study suggest that selections can be performed earlier in the  
519 breeding process. Machine and deep learning models performed better than Bayesian and  
520 RRBLUP genomic selection models and can be adopted for use in plant breeding programs,  
521 regardless of dataset sizes. Furthermore, the increase in forward prediction accuracy with the  
522 addition of more lines in the training set concluded that genomic selection models should be  
523 updated every year for the best prediction accuracy. Overall, this and previous studies showed  
524 the benefit of implementing genomic selection with machine and deep learning models for  
525 different complex traits in large scale breeding programs using collected phenotypic data from  
526 previous years.

527

528 **Acknowledgements:** We would like to thank Kerry Balow, Adrienne Burke, Gary Shelton, and  
529 Kyall Hagemeyer for assisting in population development, genotyping, and field plot  
530 maintenance.

531

532 **Conflict of interest:** Authors declare that research was conducted in the absence of any financial  
533 or commercial interests.

534

535 **Authors contribution:** Conceptualization: KSS, MA, & AHC; Writing original draft: KSS; Data  
536 analysis: KSS; Genotyping curation and filtration: MA; Review and editing: KSS, MA, CM, &  
537 AHC; Resources: CM & AHC; Supervision and Funding: AHC. All authors approved the final  
538 document for submission.

539

540 **Funding:** This project was supported by the Agriculture and Food Research Initiative  
541 Competitive Grant 2017-67007-25939 (WheatCAP), the Washington Grain Commission, the  
542 O.A. Vogel Wheat Research Fund from Washington State University, and Hatch project  
543 1014919.

544

545 **References:**

546 Antonio, Gulli and Pal S (2017) Deep learning with keras.

547 Appels R, Eversole K, Feuillet C, et al (2018) Shifting the limits in wheat research and breeding  
548 using a fully annotated reference genome. *Science* (80) 361:.  
549 <https://doi.org/10.1126/science.aar7191>

550 Bates D, Mächler M, Bolker BM, Walker SC (2015) Fitting linear mixed-effects models using  
551 lme4. *J Stat Softw* 67:.  
<https://doi.org/10.18637/jss.v067.i01>

- 552 Battenfield SD, Guzmán C, Chris Gaynor R, et al (2016) Genomic selection for processing and  
553 end-use quality traits in the CIMMYT spring bread wheat breeding program. *Plant Genome*  
554 9:. <https://doi.org/10.3835/plantgenome2016.01.0005>
- 555 Bellot P, de los Campos G, Pérez-Enciso M (2018) Can deep learning improve genomic  
556 prediction of complex human traits? *Genetics* 210:809–819.  
557 <https://doi.org/10.1534/genetics.118.301298>
- 558 Bhave M, Morris CF (2008) Molecular genetics of puroindolines and related genes: Allelic  
559 diversity in wheat and other grasses. *Plant Mol Biol* 66:205–219.  
560 <https://doi.org/10.1007/s11103-007-9263-7>
- 561 Bradbury PJ, Zhang Z, Kroon DE, et al (2007) TASSEL: Software for association mapping of  
562 complex traits in diverse samples. *Bioinformatics*.  
563 <https://doi.org/10.1093/bioinformatics/btm308>
- 564 Campbell GM, Fang C, Muhamad II (2007) On predicting roller milling performance VI: Effect  
565 of kernel hardness and shape on the particle size distribution from first break milling of  
566 wheat. *Food Bioprod Process* 85:7–23. <https://doi.org/10.1205/fbp06005>
- 567 Carter AH, Garland-Campbell K, Morris CF, Kidwell KK (2012) Chromosomes 3B and 4D are  
568 associated with several milling and baking quality traits in a soft white spring wheat  
569 (*Triticum aestivum* L.) population. *Theor Appl Genet* 124:1079–1096.  
570 <https://doi.org/10.1007/s00122-011-1770-x>
- 571 Cho M, Hegde C (2019) Reducing the search space for hyperparameter optimization using group  
572 sparsity. In: ICASSP, IEEE international conference on acoustics, speech and signal  
573 processing - proceedings. Institute of Electrical and Electronics Engineers Inc., pp 3627–  
574 3631
- 575 Chu Z, Yu J (2020) An end-to-end model for rice yield prediction using deep learning fusion.  
576 *Comput Electron Agric* 174:105471. <https://doi.org/10.1016/j.compag.2020.105471>
- 577 Crossa J, Pérez P, Hickey JB, et al (2014) Genomic prediction in CIMMYT maize and wheat  
578 breeding programs. *Heredity* 112:48–60. <https://doi.org/10.1038/hdy.2013.16>
- 579 Crossa J, Pérez-Rodríguez P, Cuevas J, et al (2017) Genomic selection in plant breeding:  
580 methods, models, and perspectives. *Trends Plant Sci.* 22:961–975
- 581 Cuevas J, Montesinos-López O, Juliana P, et al (2019) Deep kernel for genomic and near  
582 infrared predictions in multi-environment breeding trials. *G3 Genes, Genomes, Genet*  
583 9:2913–2924. <https://doi.org/10.1534/g3.119.400493>
- 584 Cullis BR, Smith AB, Coombes NE (2006) On the design of early generation variety trials with  
585 correlated data. *J Agric Biol Environ Stat* 11:381–393.  
586 <https://doi.org/10.1198/108571106X154443>
- 587 Endelman JB (2011) Ridge regression and other kernels for genomic selection with r package  
588 rrBLUP. *Plant Genome* 4:250–255. <https://doi.org/10.3835/plantgenome2011.08.0024>
- 589 Fiedler JD, Salsman E, Liu Y, et al (2017) Genome-wide association and prediction of grain and  
590 semolina quality traits in durum wheat breeding populations. *Plant Genome* 10:.

- 591 <https://doi.org/10.3835/plantgenome2017.05.0038>
- 592 Gale KR (2005) Diagnostic DNA markers for quality traits in wheat. *J Cereal Sci* 41:181–192.  
593 <https://doi.org/10.1016/j.jcs.2004.09.002>
- 594 Gianola D, Fernando RL, Stella A (2006) Genomic-assisted prediction of genetic value with  
595 semiparametric procedures. *Genetics* 173:1761–1776.  
596 <https://doi.org/10.1534/genetics.105.049510>
- 597 Gouy M, Rousselle Y, Bastianelli D, et al (2013) Experimental assessment of the accuracy of  
598 genomic selection in sugarcane. *Theor Appl Genet* 126:2575–2586.  
599 <https://doi.org/10.1007/s00122-013-2156-z>
- 600 Guzman C, Peña RJ, Singh R, et al (2016) Wheat quality improvement at CIMMYT and the use  
601 of genomic selection on it. *Appl. Transl. Genomics* 11:3–8
- 602 Habier D, Fernando RL, Garrick DJ (2013) Genomic BLUP decoded: A look into the black box  
603 of genomic prediction. *Genetics* 194:597–607. <https://doi.org/10.1534/genetics.113.152207>
- 604 Haile JK, N'Diaye A, Clarke F, et al (2018) Genomic selection for grain yield and quality traits  
605 in durum wheat. *Mol Breed* 38:1–18. <https://doi.org/10.1007/s11032-018-0818-x>
- 606 Hastie, T., Tibshirani, R., & Friedman J (2009) The elements of statistical learning: data mining,  
607 inference, and prediction.
- 608 Hayes BJ, Panozzo J, Walker CK, et al (2017) Accelerating wheat breeding for end-use quality  
609 with multi-trait genomic predictions incorporating near infrared and nuclear magnetic  
610 resonance-derived phenotypes. *Theor Appl Genet* 130:2505–2519.  
611 <https://doi.org/10.1007/s00122-017-2972-7>
- 612 He S, Schulthess AW, Mirdita V, et al (2016) Genomic selection in a commercial winter wheat  
613 population. *Theor Appl Genet*. <https://doi.org/10.1007/s00122-015-2655-1>
- 614 Heffner EL, Jannink J-L, Sorrells ME (2011a) Genomic selection accuracy using multifamily  
615 prediction models in a wheat breeding program. *Plant Genome* 4:65.  
616 <https://doi.org/10.3835/plantgenome2010.12.0029>
- 617 Heffner EL, Jannink JL, Iwata H, et al (2011b) Genomic selection accuracy for grain quality  
618 traits in biparental wheat populations. *Crop Sci* 51:2597–2606.  
619 <https://doi.org/10.2135/cropsci2011.05.0253>
- 620 Hu X, Carver BF, Powers C, et al (2019) Effectiveness of genomic selection by response to  
621 selection for winter wheat variety improvement. *Plant Genome* 12:180090.  
622 <https://doi.org/10.3835/plantgenome2018.11.0090>
- 623 Huang M, Cabrera A, Hoffstetter A, et al (2016) Genomic selection for wheat traits and trait  
624 stability. *Theor Appl Genet* 129:1697–1710. <https://doi.org/10.1007/s00122-016-2733-z>
- 625 Jarquín D, Crossa J, Lacaze X, et al (2014) A reaction norm model for genomic selection using  
626 high-dimensional genomic and environmental data. *Theor Appl Genet* 127:595–607.  
627 <https://doi.org/10.1007/s00122-013-2243-1>
- 628 Jernigan KL, Godoy J V., Huang M, et al (2018) Genetic dissection of end-use quality traits in



- 629 adapted soft white winter wheat. *Front Plant Sci* 9:1–15.  
630 <https://doi.org/10.3389/fpls.2018.00271>
- 631 Jernigan KL, Morris CF, Zemetra R, et al (2017) Genetic analysis of soft white wheat end-use  
632 quality traits in a club by common wheat cross. *J Cereal Sci* 76:148–156.  
633 <https://doi.org/10.1016/j.jcs.2017.06.005>
- 634 Juliana P, Poland J, Huerta-Espino J, et al (2019) Improving grain yield, stress resilience and  
635 quality of bread wheat using large-scale genomics. *Nat Genet* 51:1530–1539.  
636 <https://doi.org/10.1038/s41588-019-0496-6>
- 637 Khaki S, Wang L (2019) Crop yield prediction using deep neural networks. *Front Plant Sci*  
638 10:621. <https://doi.org/10.3389/fpls.2019.00621>
- 639 Kiszonas AM, Fuerst EP, Morris CF (2013) A comprehensive survey of soft wheat grain quality  
640 in U.S. germplasm. *Cereal Chem J* 90:47–57. [https://doi.org/10.1094/CCHEM-06-12-0073-](https://doi.org/10.1094/CCHEM-06-12-0073-R)  
641 R
- 642 Kiszonas AM, Fuerst EP, Morris CF (2015) Modeling end-use quality in u.s. soft wheat  
643 germplasm. *Cereal Chem J* 92:57–64. <https://doi.org/10.1094/CCHEM-06-14-0135-R>
- 644 Kristensen PS, Jahoor A, Andersen JR, et al (2018) Genome-wide association studies and  
645 comparison of models and cross-validation strategies for genomic prediction of quality  
646 traits in advanced winter wheat breeding lines. *Front Plant Sci* 9:69.  
647 <https://doi.org/10.3389/fpls.2018.00069>
- 648 Kristensen PS, Jensen J, Andersen JR, et al (2019) Genomic prediction and genome-wide  
649 association studies of flour yield and alveograph quality traits using advanced winter wheat  
650 breeding material. *Genes (Basel)* 10:669. <https://doi.org/10.3390/genes10090669>
- 651 Lecun Y, Bengio Y, Hinton G (2015) Deep learning. *Nature* 521:436–444
- 652 Liu Y, Wang D, He F, et al (2019) Phenotype prediction and genome-wide association study  
653 using deep convolutional neural network of soybean. *Front Genet* 10:1091.  
654 <https://doi.org/10.3389/fgene.2019.01091>
- 655 Lorenz AJ (2013) Resource allocation for maximizing prediction accuracy and genetic gain of  
656 genomic selection in plant breeding: A simulation experiment. *G3 Genes, Genomes, Genet*  
657 3:481–491. <https://doi.org/10.1534/g3.112.004911>
- 658 Ma W, Qiu Z, Song J, et al (2018) A deep convolutional neural network approach for predicting  
659 phenotypes from genotypes. *Planta* 248:1307–1318. [https://doi.org/10.1007/s00425-018-](https://doi.org/10.1007/s00425-018-2976-9)  
660 2976-9
- 661 Merrick LF, Carter AH (2021) Comparison of genomic selection models for exploring predictive  
662 ability of complex traits in breeding programs. *bioRxiv* 2021.04.15.440015.  
663 <https://doi.org/10.1101/2021.04.15.440015>
- 664 Meuwissen T, Hayes B, Goddard M (2016) Genomic selection: A paradigm shift in animal  
665 breeding. *Anim Front* 6:6–14. <https://doi.org/10.2527/af.2016-0002>
- 666 Meuwissen THE, Hayes BJ, Goddard ME (2001) Prediction of total genetic value using genome-

- 667 wide dense marker maps. *Genetics* 157:1819–29
- 668 Michel S, Kummer C, Gallee M, et al (2018) Improving the baking quality of bread wheat by  
669 genomic selection in early generations. *Theor Appl Genet* 131:477–493.  
670 <https://doi.org/10.1007/s00122-017-2998-x>
- 671 Montesinos-López OA, Martín-Vallejo J, Crossa J, et al (2019a) A benchmarking between deep  
672 learning, support vector machine and Bayesian threshold best linear unbiased prediction for  
673 predicting ordinal traits in plant breeding. *G3 Genes, Genomes, Genet* 9:601–618.  
674 <https://doi.org/10.1534/g3.118.200998>
- 675 Montesinos-López OA, Martín-Vallejo J, Crossa J, et al (2019b) New deep learning genomic-  
676 based prediction model for multiple traits with binary, ordinal, and continuous phenotypes.  
677 *G3 Genes, Genomes, Genet* 9:1545. <https://doi.org/10.1534/g3.119.300585>
- 678 Montesinos-López OA, Montesinos-López A, Pérez-Rodríguez P, et al (2021) A review of deep  
679 learning applications for genomic selection. *BMC Genomics* 22:1–23
- 680 Montesinos-López OA, Montesinos-López A, Tuberosa R, et al (2019c) Multi-trait, multi-  
681 environment genomic prediction of durum wheat with genomic best linear unbiased  
682 predictor and deep learning methods. *Front Plant Sci* 10:1311.  
683 <https://doi.org/10.3389/fpls.2019.01311>
- 684 Monteverde E, Gutierrez L, Blanco P, et al (2019) Integrating molecular markers and  
685 environmental covariates to interpret genotype by environment interaction in rice (*Oryza*  
686 *sativa* L.) grown in subtropical areas. *G3 Genes, Genomes, Genet* 9:1519–1531.  
687 <https://doi.org/10.1534/g3.119.400064>
- 688 Morris CF, Li S, King GE, et al (2009) A comprehensive genotype and environment assessment  
689 of wheat grain ash content in oregon and washington: analysis of variation. *Cereal Chem J*  
690 86:307–312. <https://doi.org/10.1094/CCHEM-86-3-0307>
- 691 Payne PI, Nightingale MA, Krattiger AF, Holt LM (1987) The relationship between HMW  
692 glutenin subunit composition and the bread-making quality of British-grown wheat  
693 varieties. *J Sci Food Agric* 40:51–65. <https://doi.org/10.1002/jsfa.2740400108>
- 694 Pedregosa F, Michel V, Grisel O, et al (2011) Scikit-learn: Machine learning in python
- 695 Pérez-Rodríguez P, Flores-Galarza S, Vaquera-Huerta H, et al (2020) Genome-based  
696 prediction of Bayesian linear and non-linear regression models for ordinal data. *Plant*  
697 *Genome* 13:e20021. <https://doi.org/10.1002/tpg2.20021>
- 698 Pérez P, De Los Campos G (2014) Genome-wide regression and prediction with the BGLR  
699 statistical package. *Genetics* 198:483–495. <https://doi.org/10.1534/genetics.114.164442>
- 700 Plavšín I, Gunjača J, Šatović Z, et al (2021) An overview of key factors affecting genomic  
701 selection for wheat quality traits. *Plants* 10:745. <https://doi.org/10.3390/plants10040745>
- 702 Poland JA, Brown PJ, Sorrells ME, Jannink JL (2012) Development of high-density genetic  
703 maps for barley and wheat using a novel two-enzyme genotyping-by-sequencing approach.  
704 *PLoS One* 7:. <https://doi.org/10.1371/journal.pone.0032253>

- 705 Pook T, Freudenthal J, Korte A, Simianer H (2020) Using local convolutional neural networks  
706 for genomic prediction. 1–18
- 707 Rutkoski J, Singh RP, Huerta-Espino J, et al (2015) Efficient use of historical data for genomic  
708 selection: a case study of stem rust resistance in wheat. *Plant Genome*  
709 8:plantgenome2014.09.0046. <https://doi.org/10.3835/plantgenome2014.09.0046>
- 710 Sandhu KS, Lozada DN, Zhang Z, et al (2021a) Deep learning for predicting complex traits in  
711 spring wheat breeding program. *Front Plant Sci* 11:613325.  
712 <https://doi.org/10.3389/fpls.2020.613325>
- 713 Sandhu KS, Mihalyov PD, Lewien MJ, et al (2021b) Combining genomic and phenomic  
714 information for predicting grain protein content and grain yield in spring wheat. *Front Plant*  
715 *Sci* 12:170. <https://doi.org/10.3389/fpls.2021.613300>
- 716 Sandhu KS, Mihalyov PD, Lewien MJ, et al (2021c) Genome-wide association studies and  
717 genomic selection for grain protein content stability in a nested association mapping  
718 population of spring wheat. *bioRxiv* 2021.04.15.440064.  
719 <https://doi.org/10.1101/2021.04.15.440064>
- 720 Sandhu KS, Patil SS, Pumphrey MO, Carter AH (2021d) Multi-trait machine and deep learning  
721 models for genomic selection using spectral information in a wheat breeding program.  
722 *bioRxiv* 2021.04.12.439532. <https://doi.org/10.1101/2021.04.12.439532>
- 723 Shah SH, Angel Y, Houborg R, et al (2019) A random forest machine learning approach for the  
724 retrieval of leaf chlorophyll content in wheat. *Remote Sens* 11:920.  
725 <https://doi.org/10.3390/rs11080920>
- 726 Smola A, Scholkopf B (2004) A tutorial on support vector regression. *Stat Comput* 14:199–222
- 727 Souza EJ, Guttieri MJ, Graybosch RA (2002) Breeding wheat for improved milling and baking  
728 quality. *J. Crop Prod.* 5:39–74
- 729 Srivastava N, Hinton G, Krizhevsky A, Salakhutdinov R (2014) Dropout: A simple way to  
730 prevent neural networks from overfitting.
- 731 Tsai HY, Janss LL, Andersen JR, et al (2020) Genomic prediction and GWAS of yield, quality  
732 and disease-related traits in spring barley and winter wheat. *Sci Rep* 10:1–15.  
733 <https://doi.org/10.1038/s41598-020-60203-2>
- 734 Yang Y, Chai Y, Zhang X, et al (2020) Multi-locus GWAS of quality traits in bread wheat:  
735 mining more candidate genes and possible regulatory network. *Front Plant Sci* 11:1091.  
736 <https://doi.org/10.3389/fpls.2020.01091>
- 737 Yao J, Zhao D, Chen X, et al (2018) Use of genomic selection and breeding simulation in cross  
738 prediction for improvement of yield and quality in wheat (*Triticum aestivum* L.). *Crop J*  
739 6:353–365. <https://doi.org/10.1016/j.cj.2018.05.003>
- 740 AACC Approved Methods of Analysis, 11th Edition. <http://methods.aaccnet.org/>. Accessed 19  
741 Apr 2021
- 742

743  
744  
745  
746  
747  
748

**Table 1.** Total number of lines screened across each year at two locations in Washington and phenotyped for end-use quality traits.

| <b>Location</b> | <b>Year</b> | <b>Lines screened for quality</b> |
|-----------------|-------------|-----------------------------------|
| <b>Lind</b>     | 2015        | 122                               |
|                 | 2016        | 114                               |
|                 | 2017        | 115                               |
|                 | 2018        | 71                                |
|                 | 2019        | 106                               |
| <b>Pullman</b>  | 2015        | 183                               |
|                 | 2016        | 128                               |
|                 | 2017        | 181                               |
|                 | 2018        | 137                               |
|                 | 2019        | 178                               |
| <b>Total</b>    |             | 1335                              |

749  
750  
751  
752  
753  
754  
755  
756  
757  
758  
759  
760  
761  
762  
763

764  
765  
766  
767  
768  
769  
770

**Table 2.** Summary of the fourteen end-use quality traits evaluated for genomic selection analysis using nine different prediction models.

| Trait                                      | Abbreviation                              | Units    | Number of genotypes | Mean  | Min   | Max  | S.E.  | H <sup>2</sup> |
|--------------------------------------------|-------------------------------------------|----------|---------------------|-------|-------|------|-------|----------------|
| <b>Milling traits</b>                      |                                           |          |                     |       |       |      |       |                |
| FYELD                                      | Flour yield                               | percent  | 666                 | 69.9  | 58.0  | 75.8 | 0.09  | 0.91           |
| BKYELD                                     | Break flour yield                         | percent  | 666                 | 48.1  | 33.9  | 56.6 | 0.14  | 0.93           |
| MSCOR                                      | Milling score                             | unitless | 646                 | 85.6  | 69.1  | 98.8 | 0.10  | 0.81           |
| <b>Grain characteristics</b>               |                                           |          |                     |       |       |      |       |                |
| TWT                                        | Test weight                               | Kg/hL    | 666                 | 61.8  | 54.6  | 65.9 | 0.06  | 0.92           |
| GPC                                        | Grain protein content                     | percent  | 666                 | 10.73 | 7.2   | 14.8 | 0.05  | 0.56           |
| KHRD                                       | Kernel hardness                           | unitless | 666                 | 23.0  | -10.2 | 52.4 | 0.4   | 0.93           |
| KWT                                        | Kernel weight                             | mg       | 666                 | 39.3  | 26.5  | 54.6 | 0.17  | 0.86           |
| KSIZE                                      | Kernel size                               | mm       | 666                 | 2.76  | 2.3   | 3.3  | 0.005 | 0.83           |
| <b>Baking parameters</b>                   |                                           |          |                     |       |       |      |       |                |
| CODI                                       | Cookie diameter                           | cm       | 622                 | 9.2   | 7.8   | 10.0 | 0.008 | 0.89           |
| <b>Flour parameters</b>                    |                                           |          |                     |       |       |      |       |                |
| FPROT                                      | Flour protein                             | percent  | 666                 | 8.93  | 6.3   | 13.0 | 0.04  | 0.57           |
| FASH                                       | Flour ash                                 | percent  | 646                 | 0.39  | 0.21  | 0.54 | 0.001 | 0.88           |
| FSV                                        | Flour swelling volume                     | mL/g     | 665                 | 19.06 | 14.0  | 26.3 | 0.05  | 0.63           |
| FSDS                                       | Flour SDS sedimentation                   | g/mL     | 666                 | 10.1  | 3.5   | 18.3 | 0.09  | 0.92           |
| FSRW                                       | Water solvent retention capacity in water | percent  | 666                 | 54.18 | 43.4  | 72.6 | 0.09  | 0.85           |
| S.E. is standard error                     |                                           |          |                     |       |       |      |       |                |
| H <sup>2</sup> is broad sense heritability |                                           |          |                     |       |       |      |       |                |

771  
772  
773  
774  
775  
776

777  
778  
779  
780  
781  
782  
783

**Table 3.** Genomic selection cross-validation prediction accuracies for the fourteen end-use quality traits evaluated with nine different models at two locations in Washington. The highest accuracy for each trait is bolded under different model scenarios.

| Location       | Trait  | RRBLUP      | BayesA      | Bayes B     | Bayes C     | Bayes Lasso | RF          | SVM         | MLP         | CNN         |
|----------------|--------|-------------|-------------|-------------|-------------|-------------|-------------|-------------|-------------|-------------|
| <b>Pullman</b> | FYELD  | 0.71        | 0.61        | 0.64        | 0.64        | 0.63        | <b>0.76</b> | <b>0.76</b> | 0.75        | 0.74        |
|                | BKYELD | 0.70        | 0.62        | 0.64        | 0.64        | 0.64        | 0.75        | 0.75        | <b>0.76</b> | 0.75        |
|                | MSCOR  | 0.58        | 0.52        | 0.52        | 0.53        | 0.52        | 0.60        | 0.60        | <b>0.63</b> | 0.61        |
|                | TWT    | 0.67        | 0.67        | 0.66        | 0.66        | 0.66        | 0.68        | 0.67        | <b>0.70</b> | <b>0.70</b> |
|                | GPC    | 0.55        | 0.54        | 0.54        | 0.53        | 0.53        | 0.59        | <b>0.60</b> | <b>0.60</b> | <b>0.60</b> |
|                | KHRD   | <b>0.71</b> | 0.67        | 0.67        | 0.68        | 0.67        | 0.70        | 0.69        | 0.70        | 0.69        |
|                | KWT    | 0.76        | 0.77        | 0.75        | 0.75        | 0.75        | <b>0.81</b> | 0.80        | 0.80        | 0.75        |
|                | KSIZE  | 0.77        | 0.75        | 0.74        | 0.75        | 0.77        | 0.76        | 0.76        | 0.80        | <b>0.81</b> |
|                | CODI   | 0.67        | 0.67        | 0.67        | 0.68        | 0.67        | 0.69        | 0.69        | 0.69        | <b>0.71</b> |
|                | FPROT  | 0.58        | 0.58        | 0.58        | 0.55        | 0.55        | <b>0.61</b> | 0.58        | 0.62        | 0.60        |
|                | FASH   | 0.55        | 0.56        | <b>0.59</b> | 0.58        | <b>0.59</b> | 0.58        | <b>0.59</b> | <b>0.59</b> | <b>0.59</b> |
|                | FSV    | 0.55        | 0.54        | 0.53        | 0.53        | 0.53        | 0.59        | <b>0.60</b> | <b>0.60</b> | <b>0.60</b> |
|                | FSDS   | 0.67        | 0.67        | 0.66        | 0.66        | 0.67        | 0.69        | 0.69        | <b>0.70</b> | <b>0.70</b> |
|                | FSRW   | 0.58        | 0.52        | 0.52        | 0.52        | 0.52        | 0.60        | 0.60        | 0.61        | <b>0.62</b> |
| <b>Lind</b>    | FYELD  | 0.64        | 0.55        | 0.58        | 0.56        | 0.58        | 0.68        | <b>0.69</b> | 0.67        | 0.67        |
|                | BKYELD | 0.63        | 0.55        | 0.57        | 0.56        | 0.57        | 0.67        | 0.68        | <b>0.69</b> | <b>0.69</b> |
|                | MSCOR  | 0.48        | 0.49        | <b>0.53</b> | 0.50        | 0.52        | 0.50        | 0.52        | 0.52        | 0.50        |
|                | TWT    | 0.61        | 0.61        | 0.60        | 0.61        | 0.60        | 0.61        | 0.61        | 0.63        | <b>0.64</b> |
|                | GPC    | 0.51        | 0.51        | 0.51        | 0.47        | 0.47        | 0.54        | 0.52        | <b>0.55</b> | 0.53        |
|                | KHRD   | <b>0.58</b> | 0.56        | 0.56        | 0.57        | 0.54        | 0.56        | 0.57        | 0.57        | 0.57        |
|                | KWT    | 0.65        | 0.65        | 0.63        | 0.63        | 0.63        | <b>0.70</b> | 0.66        | 0.69        | 0.63        |
|                | KSIZE  | 0.66        | 0.64        | 0.62        | 0.63        | 0.66        | 0.64        | 0.64        | <b>0.69</b> | 0.68        |
|                | CODI   | 0.56        | 0.54        | 0.54        | 0.56        | 0.55        | 0.57        | <b>0.58</b> | <b>0.58</b> | <b>0.58</b> |
|                | FPROT  | 0.48        | 0.48        | 0.46        | 0.46        | 0.46        | 0.51        | 0.53        | 0.53        | <b>0.54</b> |
|                | FASH   | 0.51        | 0.44        | 0.44        | 0.45        | 0.44        | 0.54        | 0.53        | <b>0.56</b> | 0.53        |
|                | FSV    | 0.48        | 0.47        | 0.46        | 0.45        | 0.46        | <b>0.54</b> | <b>0.54</b> | 0.53        | 0.53        |
|                | FSDS   | 0.59        | 0.60        | 0.59        | 0.60        | 0.59        | 0.62        | <b>0.63</b> | <b>0.63</b> | 0.62        |
|                | FSRW   | 0.52        | 0.45        | 0.45        | 0.45        | 0.46        | 0.53        | 0.53        | <b>0.54</b> | <b>0.54</b> |
| <b>Average</b> |        | <b>0.61</b> | <b>0.58</b> | <b>0.58</b> | <b>0.58</b> | <b>0.58</b> | <b>0.63</b> | <b>0.63</b> | <b>0.64</b> | <b>0.63</b> |

All the abbreviation are previously abbreviated in the text and Table 2.

784  
785  
786

787  
788  
789  
790  
791  
792

**Table 4.** Genomic selection across environment prediction accuracies for fourteen end-use quality traits evaluated with four different models. 2019\_Pullan\_Lind denotes the scenario where 2019\_Pullman was predicted using datasets from Lind as the training set and vice versa for 2019\_Lind\_Pullan. The highest accuracy for each trait is bolded under different model scenarios.

| Location                 | Trait  | RRBLUP      | RF          | MLP         | CNN         |
|--------------------------|--------|-------------|-------------|-------------|-------------|
| <b>2019_Pullman_Lind</b> | FYELD  | 0.41        | 0.48        | <b>0.50</b> | 0.46        |
|                          | BKYELD | 0.31        | 0.38        | 0.38        | <b>0.40</b> |
|                          | MSCOR  | 0.27        | <b>0.30</b> | <b>0.30</b> | <b>0.30</b> |
|                          | TWT    | 0.32        | 0.37        | <b>0.38</b> | <b>0.38</b> |
|                          | GPC    | 0.25        | 0.30        | 0.31        | <b>0.33</b> |
|                          | KHRD   | 0.32        | 0.37        | 0.36        | <b>0.38</b> |
|                          | KWT    | 0.34        | <b>0.37</b> | 0.36        | 0.36        |
|                          | KSIZE  | 0.34        | 0.38        | 0.38        | <b>0.40</b> |
|                          | CODI   | 0.40        | 0.45        | <b>0.46</b> | <b>0.46</b> |
|                          | FPROT  | 0.35        | 0.40        | 0.40        | <b>0.41</b> |
|                          | FASH   | 0.40        | 0.41        | 0.41        | <b>0.42</b> |
|                          | FSV    | 0.27        | 0.36        | <b>0.39</b> | 0.36        |
|                          | FSDS   | 0.36        | <b>0.44</b> | 0.43        | 0.41        |
|                          | FSRW   | 0.36        | 0.39        | 0.41        | <b>0.42</b> |
| <b>2019_Lind_Pullman</b> | FYELD  | 0.43        | 0.47        | <b>0.50</b> | 0.49        |
|                          | BKYELD | 0.31        | 0.40        | <b>0.41</b> | 0.40        |
|                          | MSCOR  | 0.28        | 0.29        | <b>0.31</b> | <b>0.31</b> |
|                          | TWT    | 0.31        | 0.36        | 0.35        | <b>0.37</b> |
|                          | GPC    | 0.27        | 0.30        | 0.28        | <b>0.31</b> |
|                          | KHRD   | 0.33        | 0.33        | <b>0.38</b> | 0.37        |
|                          | KWT    | 0.34        | 0.37        | <b>0.38</b> | 0.37        |
|                          | KSIZE  | 0.35        | 0.39        | <b>0.40</b> | <b>0.40</b> |
|                          | CODI   | 0.42        | 0.44        | <b>0.46</b> | <b>0.46</b> |
|                          | FPROT  | 0.34        | <b>0.42</b> | <b>0.42</b> | 0.40        |
|                          | FASH   | 0.41        | <b>0.42</b> | <b>0.42</b> | 0.40        |
|                          | FSV    | 0.30        | 0.38        | 0.38        | <b>0.42</b> |
|                          | FSDS   | 0.38        | <b>0.41</b> | 0.40        | 0.40        |
|                          | FSRW   | 0.37        | 0.41        | 0.41        | <b>0.43</b> |
| <b>Average</b>           |        | <b>0.34</b> | <b>0.38</b> | <b>0.39</b> | <b>0.39</b> |

All the abbreviation are previously abbreviated in the text and Table 2.

793  
794  
795  
796

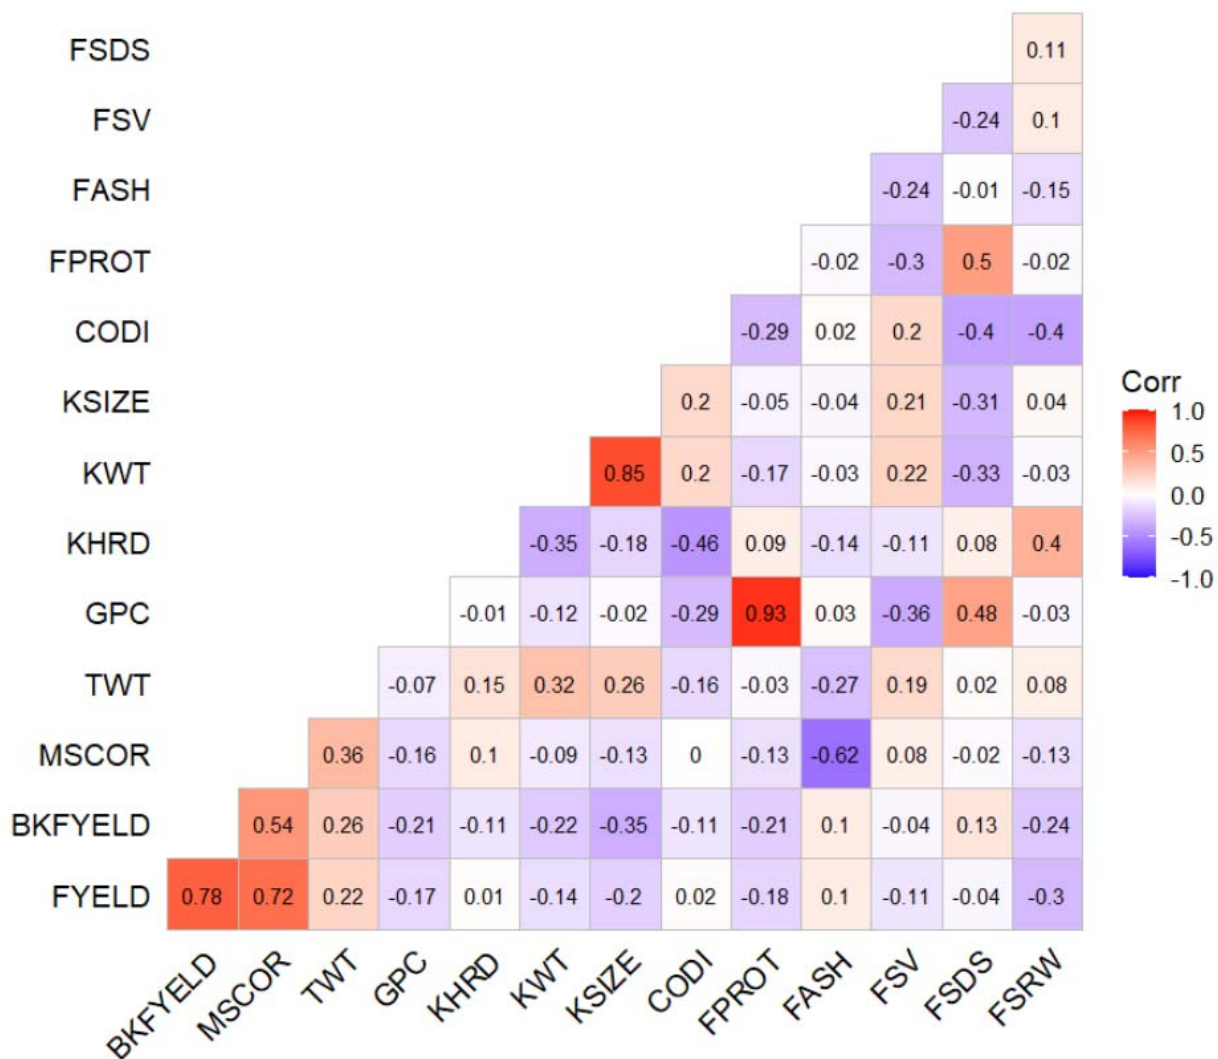

797

798 **Figure 1:** Phenotypic correlation between different end-use quality traits evaluated across two locations in  
 799 Washington and five years using best linear unbiased predictors. All the abbreviation are previously abbreviated in  
 800 the text and Table 2.

801

802



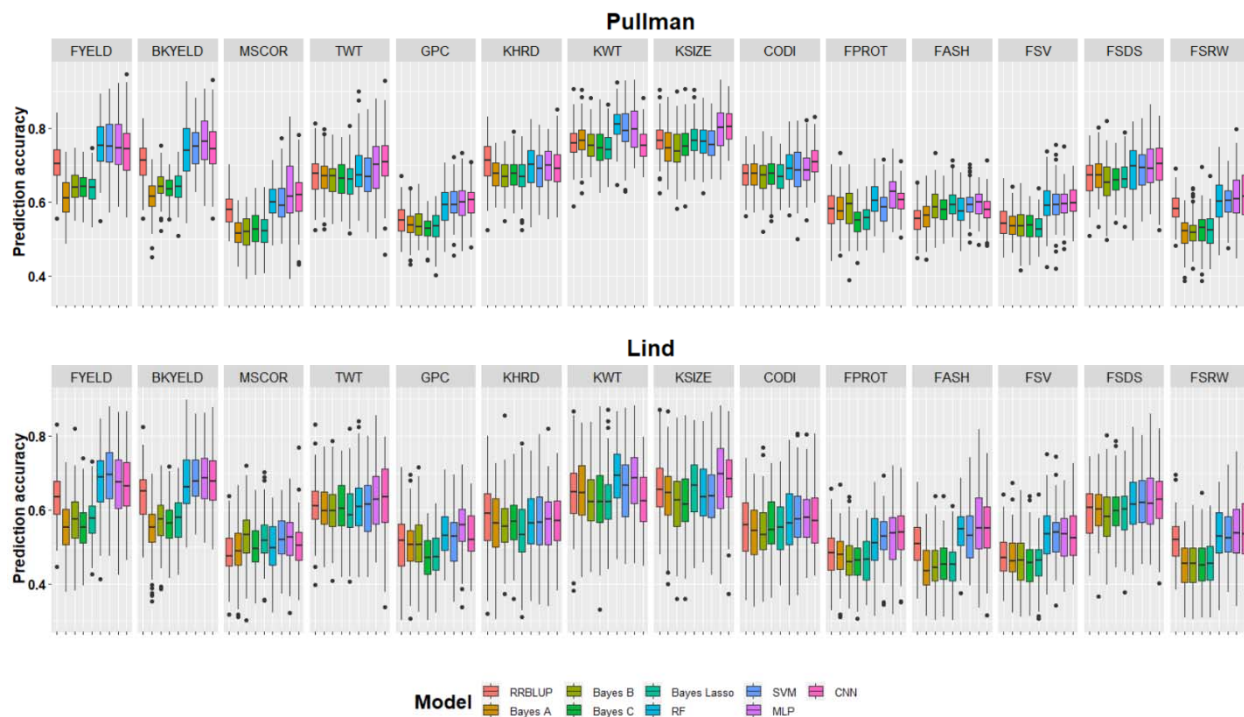

803

804 **Figure 2.** Genomic selection cross-validation prediction accuracies for fourteen end-use quality traits evaluated with  
805 nine different models. Results are provided separately for both locations and each trait is separated with facets.

806

807

808

809

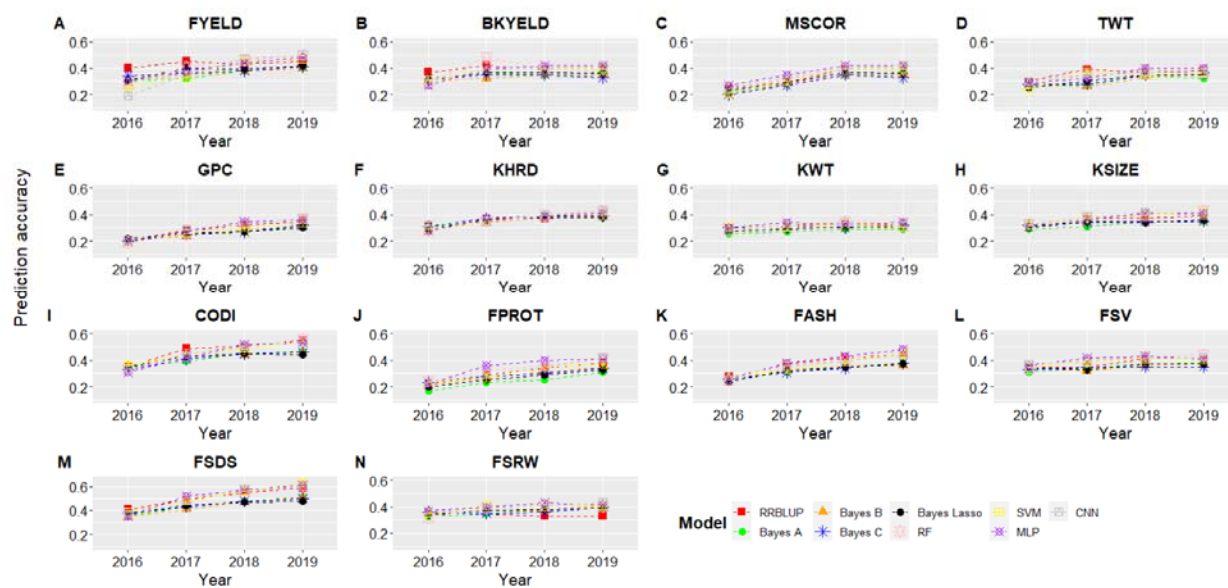

810

811 **Figure 3.** Genomic selection forward prediction accuracies for Pullman, WA, when all datasets from previous years  
812 were included to predict fourteen end-use quality traits using nine different models. The x-axis represents the year  
813 for which predictions were made using previous years as training set. All abbreviations are previously abbreviated in  
814 the text and Table 2.

815

816

817

818

819

820

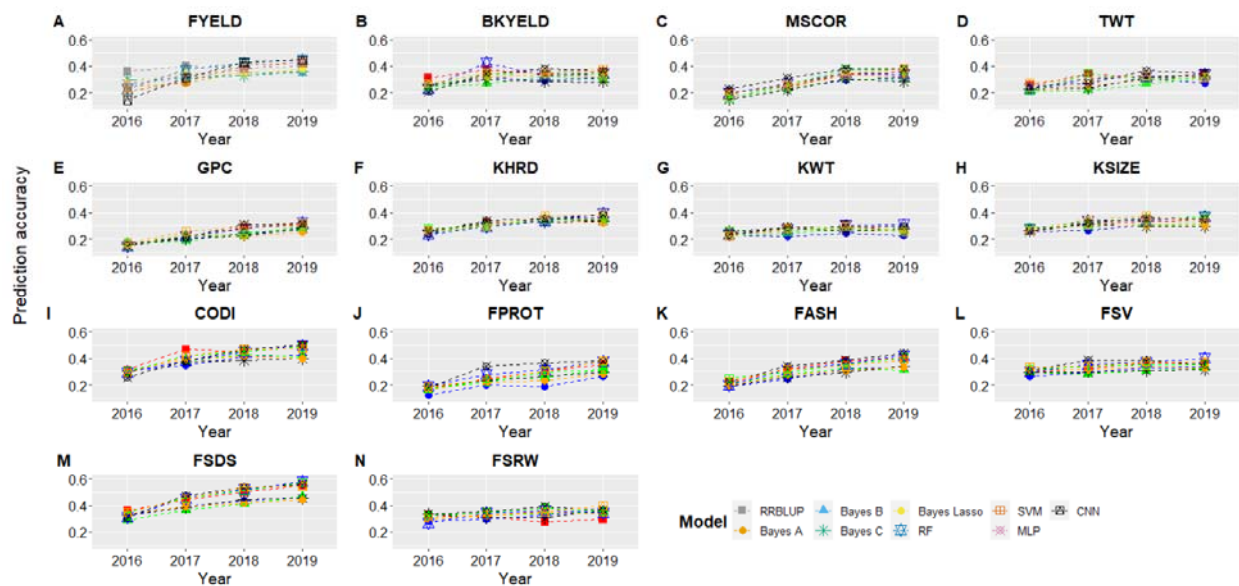

821

822 **Figure 4.** Genomic selection forward prediction accuracies for Lind, WA, when all datasets from previous years  
823 were included to predict fourteen end-use quality traits using nine different models. The x-axis represents the year  
824 for which predictions were made using previous years as the training set. All abbreviations are previously  
825 abbreviated in the text and Table 2.

826

827

828

829

830

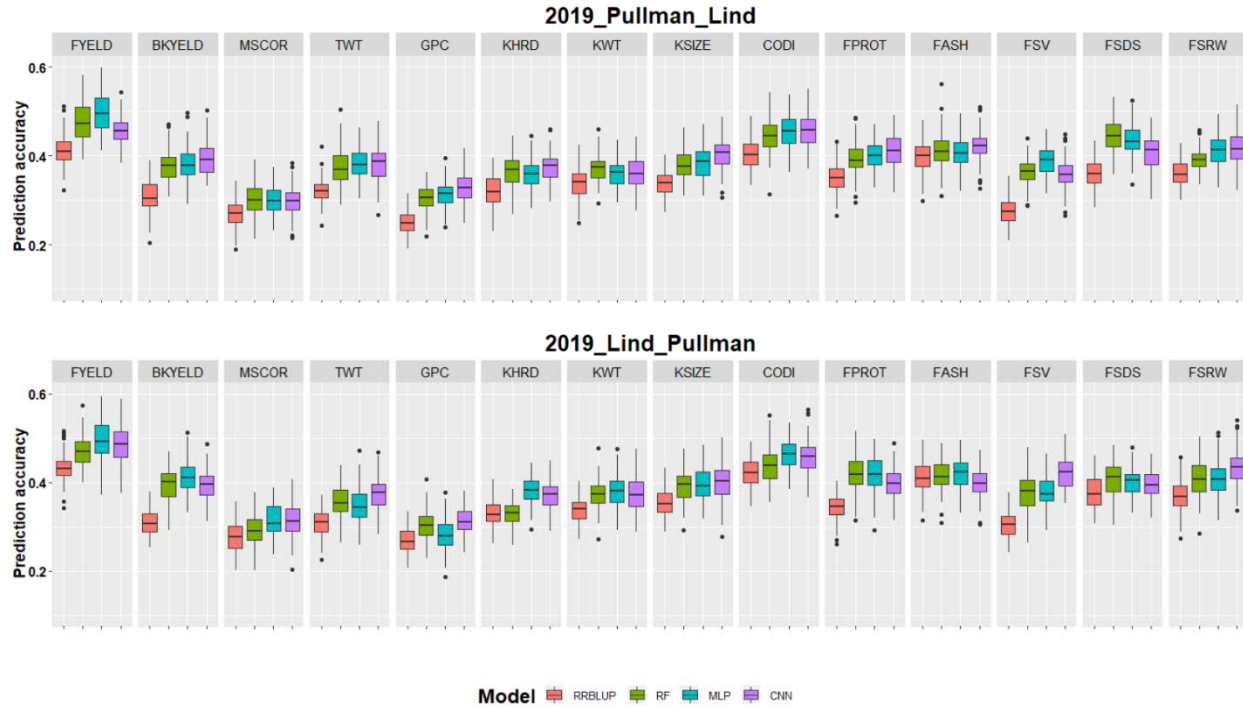

831

832 **Figure 2.** Genomic selection across environment prediction accuracies for fourteen end-use quality traits evaluated  
833 with four different models. 2019\_Pullan\_Lind denotes the scenario where 2019\_Pullman was predicted using  
834 datasets from Lind as training set and vice versa for 2019\_Lind\_Pullman. Results are provided separately for both  
835 locations and each trait is separated with facets.

836

837
